# Supplementary material for: Treatment of neovascular age-related macular degeneration: insights into drug-switch real-world from the Berlin Macular Registry
Source: PubMed Central journal article supplement (PMC10198863; doi:10.1007/s00417-022-05952-8), 2023-01-12
Supplement: 417_2022_5952_MOESM1_ESM.pdf [file 417_2022_5952_MOESM1_ESM.pdf]

**Table S1**

Criteria for qualitative OCT analysis

| <b>Criteria</b>                   | <b>Assessment</b>                 |
|-----------------------------------|-----------------------------------|
| <b>Image quality</b>              | Optimal/ sufficient/ insufficient |
| <b>Foveal depression</b>          |                                   |
| <b>Macular edema</b>              |                                   |
| <b>Intraretinal fluid</b>         | Present/ not present              |
| <b>Subretinal fluid</b>           |                                   |
| <b>RPE<sup>a</sup> detachment</b> |                                   |

<sup>a</sup>RPE, retinal pigment epithelia
