# Supplementary material for: Treatment of neovascular age-related macular degeneration: insights into drug-switch real-world from the Berlin Macular Registry
Source: PubMed Central journal article supplement (PMC10198863; doi:10.1007/s00417-022-05952-8), 2023-01-12
Supplement: 417_2022_5952_MOESM2_ESM.pdf [file 417_2022_5952_MOESM2_ESM.pdf]

**Table S2**

Breakdown of patients with secondary diagnoses (n=60; 90.8%) and operations on the study eye (n=46; 70.8%)

| <b>Secondary diagnoses<br/>(N=60)</b>                                                      | <b>N (%)</b> |
|--------------------------------------------------------------------------------------------|--------------|
| Cataract                                                                                   | 14 (21,5%)   |
| Pseudophakia                                                                               | 41 (63,1%)   |
| Glaucoma                                                                                   | 14 (21,5%)   |
| Primary open-angle glaucoma                                                                | 4 (6,2%)     |
| Other glaucoma                                                                             | 10 (15,4%)   |
| Retinal artery occlusion                                                                   | 1 (1,5%)     |
| Corneal diseases                                                                           | 1 (1,5%)     |
| Uveitis                                                                                    | 2 (3,1%)     |
| Eyelid disease                                                                             | 5 (7,7%)     |
| <b>Eye surgery<br/>(N=57)</b>                                                              | <b>N (%)</b> |
| Cataract surgery                                                                           | 41 (71,9%)   |
| Laser surgery (ALC <sup>a</sup> , YAG <sup>b</sup> laser iridotomy, YAG laser capsulotomy) | 8 (14%)      |
| Minimally invasive glaucoma surgery (iStent, trabectome, canaloplasty ab interno)          | 1 (1,8%)     |
| Vitrectomy                                                                                 | 2 (3,5%)     |
| Eyelid surgery                                                                             | 2 (3,5%)     |

<sup>a</sup>ALC, argon-laser-coagulation; <sup>b</sup>YAG, yttrium-aluminum-garnet
