# Supplementary material for: Treatment of neovascular age-related macular degeneration: insights into drug-switch real-world from the Berlin Macular Registry
Source: PubMed Central journal article supplement (PMC10198863; doi:10.1007/s00417-022-05952-8), 2023-01-12
Supplement: 417_2022_5952_MOESM3_ESM.pdf [file 417_2022_5952_MOESM3_ESM.pdf]

**Table S3**

Sensitivity analyses for primary switch (n=65):

| <b>Switch distance</b>                                                                     |                      |                     |
|--------------------------------------------------------------------------------------------|----------------------|---------------------|
| <b>Distance between last A<sup>a</sup>/R<sup>b</sup> and first B<sup>c</sup> [in days]</b> | 80.2± 4.1            |                     |
| <b>Drug exposure</b>                                                                       |                      |                     |
| <b>Therapy time [in years]</b>                                                             | <b>Before switch</b> | <b>After switch</b> |
|                                                                                            | 2.9± 0.3             | 0.84± 0.1           |
| <b>Number of IVT-injections</b>                                                            | 16.3± 1.5            | 7.78± 0.5           |
| <b>Interval between last two recorded IVT-injections [in days]</b>                         | 39± 3.1              | 39.8± 2.1           |
| <b>Assigned finding distances</b>                                                          |                      |                     |
| <b>IVT-injection to BCVA distance [in days]</b>                                            | <b>Before switch</b> | <b>After switch</b> |
|                                                                                            | 37.2± 3.3            | 37.2± 2.2           |
| <b>IVT-injection to OCT distance [in days]</b>                                             | 36.8± 2.1            | 36.2± 1.9           |

<sup>a</sup>A, aflibercept; <sup>b</sup>R, ranibizumab; <sup>c</sup>B, bevacizumab
