# Supplementary material for: Treatment of neovascular age-related macular degeneration: insights into drug-switch real-world from the Berlin Macular Registry
Source: PubMed Central journal article supplement (PMC10198863; doi:10.1007/s00417-022-05952-8), 2023-01-12
Supplement: 417_2022_5952_MOESM4_ESM.pdf [file 417_2022_5952_MOESM4_ESM.pdf]

**Table S4**

Demographic and clinical characteristics of subgroups

|                                                           |                  | <b>Backswitch group<br/>(N=28)</b> | <b>Inverse group<br/>(N=37)</b> |
|-----------------------------------------------------------|------------------|------------------------------------|---------------------------------|
| <b>Sex</b>                                                | <b>Male</b>      | 12 (42.9%)                         | 14 (37.8%)                      |
|                                                           | <b>Female</b>    | 16 (57.1%)                         | 23 (62.2%)                      |
| <b>Age [in years]<sup>a</sup></b>                         | <b>Mean</b>      | 77.6±1.4                           | 79.5±1.6                        |
|                                                           | <b>Median</b>    | 76.9 (62.1;93.2)                   | 79.7 (63.5;98.1)                |
| <b>Study eye</b>                                          | <b>Right Eye</b> | 13 (46.4%)                         | 16 (43.2%)                      |
|                                                           | <b>Left Eye</b>  | 15 (53.6%)                         | 21 (56.8%)                      |
| <b>Visual aquity<sup>a</sup><br/>[in LogMAR]</b>          | <b>Mean</b>      | 0.47±0.06                          | 0.61±0.07                       |
|                                                           | <b>Median</b>    | 0.4 (0;1.5)                        | 0.5 (0.1±1.5)                   |
| <b>Intraocular pressure<sup>a</sup><br/>[in mmHg]</b>     | <b>Mean</b>      | 13.7±0.5                           | 13.9±0.4                        |
|                                                           | <b>Median</b>    | 14 (9;20)                          | 13.5 (9;18)                     |
| <b>CRT [in μm]<sup>a</sup></b>                            | <b>Mean</b>      | 329.4±18.7                         | 290.1±12.1                      |
|                                                           | <b>Median</b>    | 301 (204;619)                      | 290 (129;464)                   |
| <b>Macular volume<sup>a</sup><br/>[in mm<sup>3</sup>]</b> | <b>Mean</b>      | 8.2±0.24                           | 7.9±0.18                        |
|                                                           | <b>Median</b>    | 8.17 (5.6;11.4)                    | 7.9 (5.2;9.3)                   |
| <b>Treatment time [in years]</b>                          | <b>Mean</b>      | 5.5±0.5                            | 4.2±0.4                         |
|                                                           | <b>Median</b>    | 5.9 (1.2;9.8)                      | 4.1 (0.6;8.0)                   |
| <b>IVT injections</b>                                     | <b>Mean</b>      | 34.6±2.6                           | 25.5±2.1                        |
|                                                           | <b>Median</b>    | 33.5 (10;58)                       | 24 (6;64)                       |

<sup>a</sup>Baseline = date of the last IVT injection before switch to bevacizumab
