# Supplementary material for: Treatment of neovascular age-related macular degeneration: insights into drug-switch real-world from the Berlin Macular Registry
Source: PubMed Central journal article supplement (PMC10198863; doi:10.1007/s00417-022-05952-8), 2023-01-12
Supplement: 417_2022_5952_MOESM5_ESM.pdf [file 417_2022_5952_MOESM5_ESM.pdf]

**Table S5**

Sensitivity analyses for secondary switch (backswitch group, n=28)

| <b>Switch distance</b>                                                                                      |                      |                     |                          |                         |
|-------------------------------------------------------------------------------------------------------------|----------------------|---------------------|--------------------------|-------------------------|
| <b>Primary-switch-distance between last A<sup>a</sup>/R<sup>b</sup> and first B<sup>c</sup> [in days]</b>   | 81.1± 5.8            |                     |                          |                         |
| <b>Secondary-switch-distance between last A<sup>a</sup>/R<sup>b</sup> and first B<sup>c</sup> [in days]</b> | 52.0± 3.5            |                     |                          |                         |
| <b>Drug exposure</b>                                                                                        | <b>before switch</b> | <b>after switch</b> | <b>before switchback</b> | <b>after switchback</b> |
| <b>Therapy time [in years]</b>                                                                              | 3.1± 0.5             | 0.5± 0.07           | 0.5± 0.07                | 0.8± 0.09               |
| <b>Number of IVT-injections</b>                                                                             | 17.7± 2.5            | 5.6± 0.5            | 5.6± 0.5                 | 7.9± 0.8                |
| <b>Interval between last two recorded IVT-injections [in days]</b>                                          | 33.9± 2.2            | 33.9± 2.0           | 33.9± 2.0                | 49.5± 6.0               |
| <b>Assigned finding distances</b>                                                                           | <b>before switch</b> | <b>after switch</b> | <b>before switchback</b> | <b>after switchback</b> |
| <b>IVT-injection to BCVA distance [in days]</b>                                                             | 36.1± 3.2            | 34.9± 2.5           | 32.4± 1.1                | 39.2± 3.1               |
| <b>IVT-injection to OCT distance [in days]</b>                                                              | 34.9± 3.0            | 34.9± 2.5           | 32.1± 1.0                | 37.7± 2.6               |

<sup>a</sup>A, aflibercept; <sup>b</sup>R, ranibizumab; <sup>c</sup>B, bevacizumab
