# Supplementary material for: Treatment of neovascular age-related macular degeneration: insights into drug-switch real-world from the Berlin Macular Registry
Source: PubMed Central journal article supplement (PMC10198863; doi:10.1007/s00417-022-05952-8), 2023-01-12
Supplement: 417_2022_5952_MOESM6_ESM.pdf [file 417_2022_5952_MOESM6_ESM.pdf]

**Table S6**

Sensitivity analyses for secondary switch (inverse group, n=37)

| <b>Switch distance</b>                                                                     |                      |                     |
|--------------------------------------------------------------------------------------------|----------------------|---------------------|
| <b>Distance between last A<sup>a</sup>/R<sup>b</sup> and first B<sup>c</sup> [in days]</b> | 79.5± 5.8            |                     |
| <b>Drug exposure</b>                                                                       |                      |                     |
|                                                                                            | <b>Before switch</b> | <b>After switch</b> |
| <b>Therapy time [in years]</b>                                                             | 3.2± 0.4             | 1.0± 0.1            |
| <b>Number of IVT-injections</b>                                                            | 16.5± 2.0            | 8.7± 0.7            |
| <b>Interval between the last two recorded IVT-injections [in days]</b>                     | 42.8± 5.1            | 44.2± 3.3           |
| <b>Assigned finding distances</b>                                                          |                      |                     |
|                                                                                            | <b>Before switch</b> | <b>After switch</b> |
| <b>IVT-injection to BCVA distance [in days]</b>                                            | 38.0± 2.9            | 39.1± 3.4           |
| <b>IVT-injection to OCT distance [in days]</b>                                             | 38.4± 2.8            | 37.1± 2.8           |

**A<sup>a</sup> = aflibercept; B<sup>b</sup> = ranibizumab; C<sup>c</sup> = bevacizumab**
