# Supplementary material for: Treatment of neovascular age-related macular degeneration: insights into drug-switch real-world from the Berlin Macular Registry
Source: PubMed Central journal article supplement (PMC10198863; doi:10.1007/s00417-022-05952-8), 2023-01-12
Supplement: 417_2022_5952_MOESM7_ESM.pdf [file 417_2022_5952_MOESM7_ESM.pdf]

**Table S7**

Sensitivity analyses for comparison of aflibercept and ranibizumab

| <b>Subgroup – functional and anatomical outcome</b> |                                                     | <b>Before switch</b> | <b>After switch</b> |
|-----------------------------------------------------|-----------------------------------------------------|----------------------|---------------------|
| <b>Aflibercept to<br/>bevacizumab</b><br>(n=32)     | <b>Visual acuity [in LogMAR]</b>                    | 0.45                 | 0.60                |
|                                                     | <b>CRT [in <math>\mu\text{m}</math>]</b>            | 303.8                | 335.9               |
|                                                     | <b>Macular volume [in <math>\text{mm}^3</math>]</b> | 7.9                  | 8.2                 |
| <b>Ranibizumab to<br/>bevacizumab</b><br>(n=33)     | <b>Visual acuity [in LogMAR]</b>                    | 0.68                 | 0.76                |
|                                                     | <b>CRT [in <math>\mu\text{m}</math>]</b>            | 316.1                | 336.0               |
|                                                     | <b>Macular volume [in <math>\text{mm}^3</math>]</b> | 8.2                  | 8.3                 |

  

| <b>Subgroup – treatment interval</b>            |                                           | <b>Days</b> |
|-------------------------------------------------|-------------------------------------------|-------------|
| <b>Aflibercept to<br/>bevacizumab</b><br>(n=32) | <b>Before switch</b>                      | 38.6        |
|                                                 | <b>After switch (initial)<sup>a</sup></b> | 32.1        |
|                                                 | <b>After switch</b>                       | 41.8        |
| <b>Ranibizumab to<br/>bevacizumab</b><br>(n=33) | <b>Before switch</b>                      | 39.4        |
|                                                 | <b>After switch (initial)<sup>a</sup></b> | 33.5        |
|                                                 | <b>After switch</b>                       | 37.9        |

<sup>a</sup>after switch (initial), interval between first and second injection<sup>b</sup>after switch, interval between penultimate and last injection
